# Supplementary material for: Metabolic rewiring during bone development underlies tRNA m7G–associated primordial dwarfism
Source: JCI journal article supplement (doi:10.1172/jci177220), 2024-09-10
Supplement: sd1 [file 1]

# Supplemental Information

## **Metabolic rewiring during bone development underlies tRNA m<sup>7</sup>G-associated primordial dwarfism**

Qiwen Li<sup>1,5</sup>, Shuang Jiang<sup>1,5</sup>, Kexin Lei<sup>1</sup>, Hui Han<sup>2</sup>, Yaqian Chen<sup>1</sup>, Weimin Lin<sup>1</sup>, Qiuchan Xiong<sup>1</sup>, Xingying Qi<sup>1</sup>, Xinyan Gan<sup>1</sup>, Rui Sheng<sup>1</sup>, Yuan Wang<sup>1</sup>, Yarong Zhang<sup>1</sup>, Jieyi Ma<sup>2</sup>, Tao Li<sup>3</sup>, Shuibin Lin<sup>2</sup>, Chenchen Zhou<sup>1,\*</sup>, Demeng Chen<sup>4,\*</sup> and Quan Yuan<sup>1,\*</sup>

<sup>1</sup>State Key Laboratory of Oral Diseases & National Center for Stomatology & National Clinical Research Center for Oral Diseases, West China Hospital of Stomatology, Sichuan University

<sup>2</sup>Center for Translational Medicine, Precision Medicine Institute, The First Affiliated Hospital, Sun Yat-sen University, Guangzhou 510080, China.

<sup>3</sup>West China-Washington Mitochondria and Metabolism Center and Department of Anesthesiology, West China Hospital, Sichuan University, Chengdu 610041, China.

<sup>4</sup>Otorhinolaryngology Hospital, The First Affiliated Hospital, Sun Yat-sen University, Guangzhou 510080, China.

<sup>5</sup>These authors contributed equally.

\*Correspondence to Quan Yuan (lead contact, [yuanquan@scu.edu.cn](mailto:yuanquan@scu.edu.cn)), Demeng Chen ([chendm29@mail.sysu.edu.cn](mailto:chendm29@mail.sysu.edu.cn)) and Chenchen Zhou ([chenchenzhou5510@scu.edu.cn](mailto:chenchenzhou5510@scu.edu.cn)).

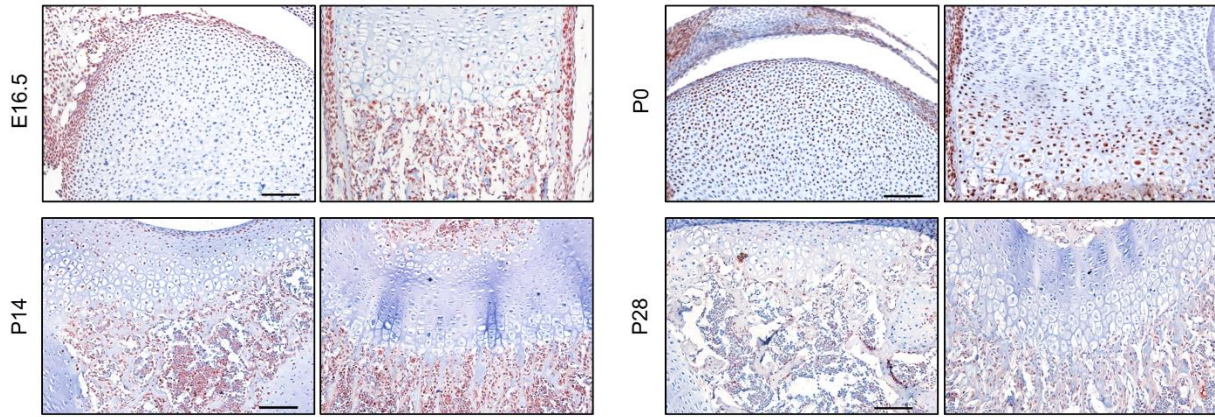

**Figure S1 METTL1 expression in mouse long bone**

Representative immunohistological staining of METTL1 expression in femur at different time points. Scale bar, 50  $\mu\text{m}$ .

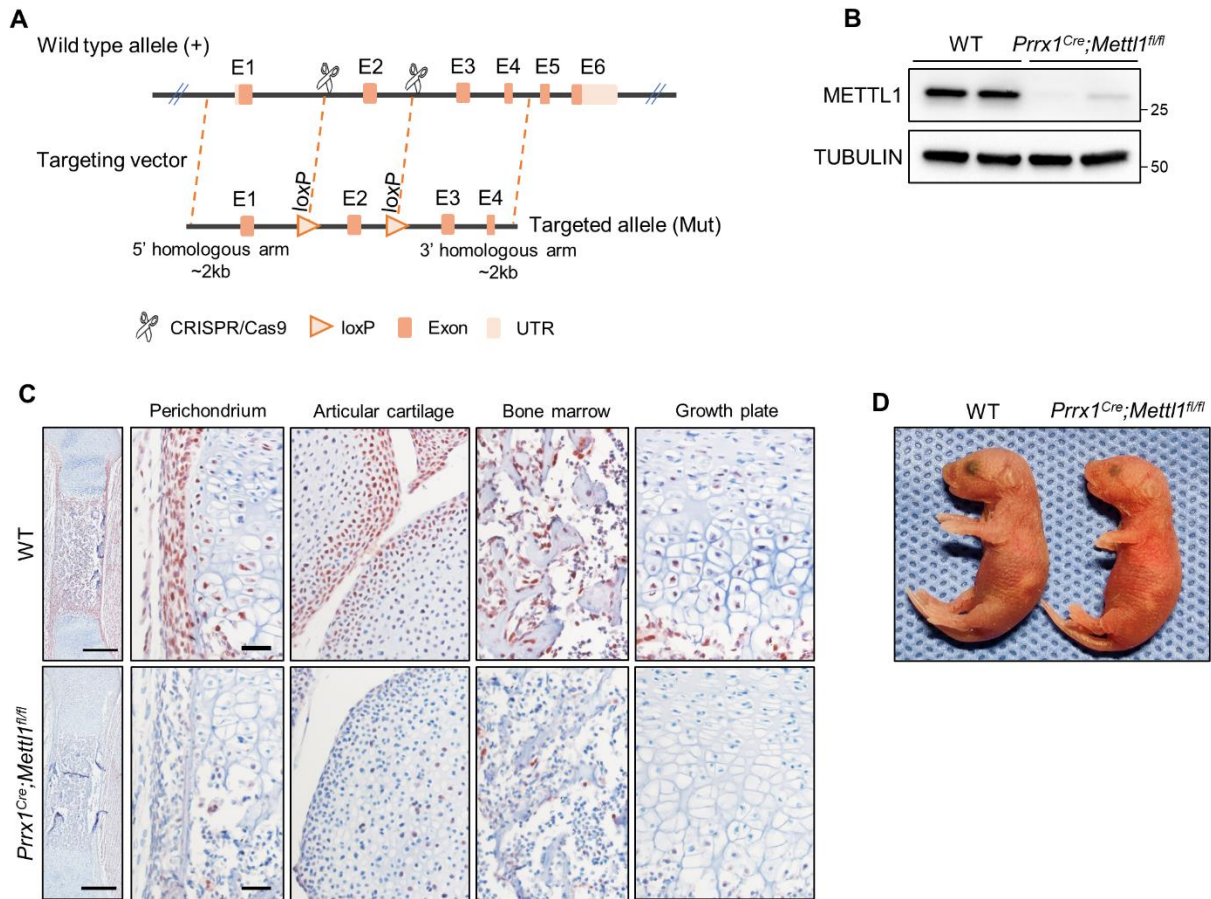

### Figure S2 Construction of *Prrx1<sup>Cre</sup>;Mettl1<sup>fl/fl</sup>* mice

(A) Schematic representation of *Mettl1* conditional knockout strategy. Exon 2 is deleted upon Cre-mediated recombination.

(B) Western blot analysis of METTL1 expression in WT and *Prrx1<sup>Cre</sup>;Mettl1<sup>fl/fl</sup>* mouse limb tissue lysates at E14.5.

(C) Representative immunohistological staining of METTL1 in WT and *Prrx1<sup>Cre</sup>;Mettl1<sup>fl/fl</sup>* mouse femur at P0. Scale bar, 200  $\mu$ m (left) and 20  $\mu$ m (right).

(D) Representative images of WT and *Prrx1<sup>Cre</sup>;Mettl1<sup>fl/fl</sup>* mice at P0.

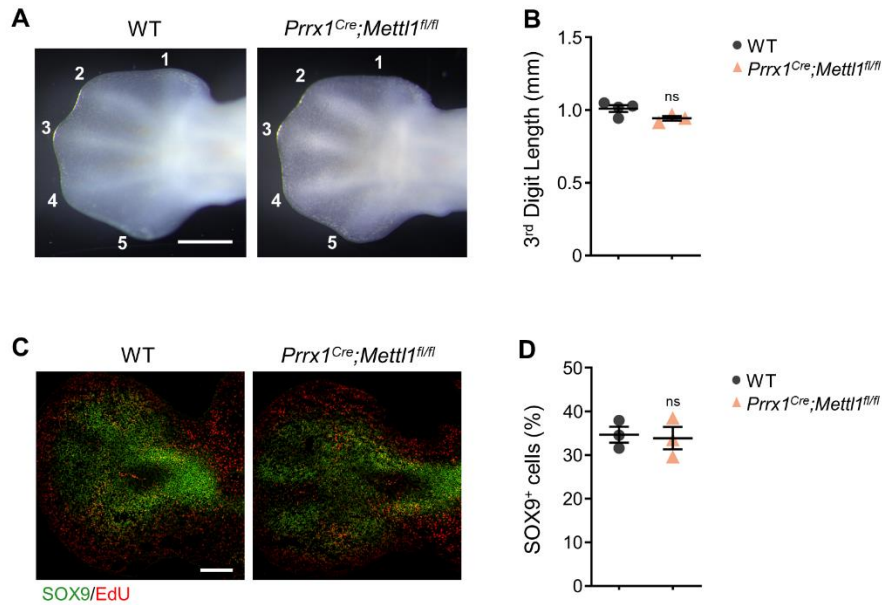

**Figure S3 Deletion of *Mettl1* does not impair limb patterning**

(A) Representative images of WT and *Prrx1<sup>Cre</sup>;Mettl1<sup>fl/fl</sup>* mouse forelimb bud at E12.5. Scale bar, 500  $\mu$ m.

(B) Quantification of third digit length of WT and *Prrx1<sup>Cre</sup>;Mettl1<sup>fl/fl</sup>* mouse forelimb bud at E12.5. n = 4 (WT) or 3 (*Prrx1<sup>Cre</sup>;Mettl1<sup>fl/fl</sup>*).

(C & D) Representative immunostaining and quantification of SOX9 in WT and *Prrx1<sup>Cre</sup>;Mettl1<sup>fl/fl</sup>* mouse forelimb bud at E12.5. Scale bar, 200  $\mu$ m. n = 3.

Data are expressed as mean  $\pm$  s.e.m; *P* value was calculated by two-tailed Student's *t* test. ns, not significant.



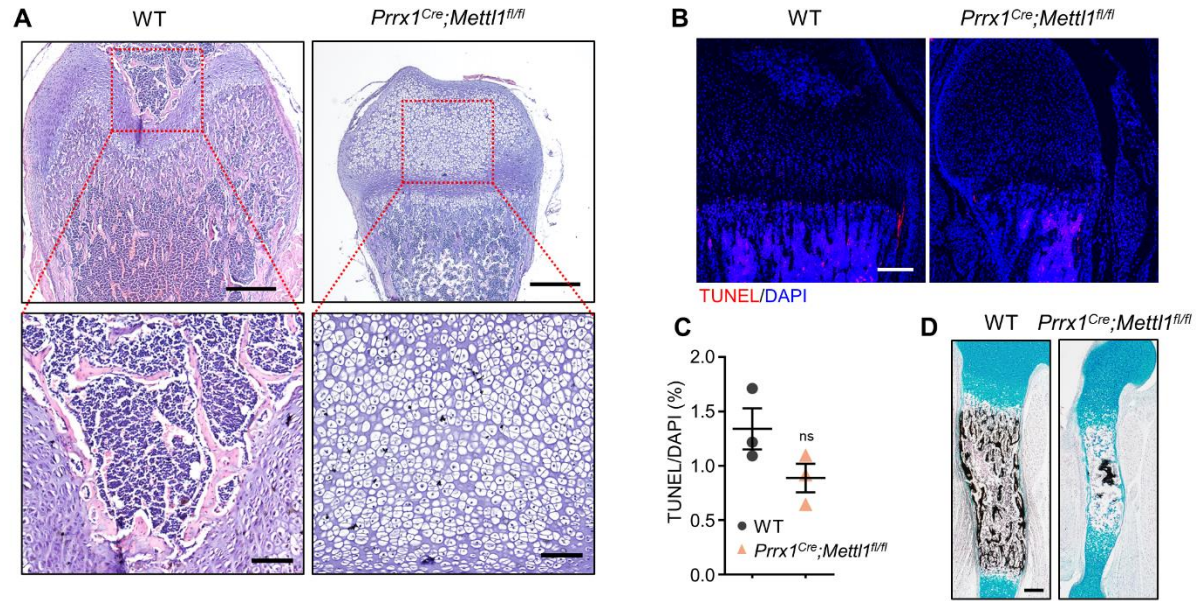

**Figure S4 Deletion of *Mettl1* inhibits bone formation**

(A) H&E staining of WT and *Prrx1<sup>Cre</sup>;Mettl1<sup>fl/fl</sup>* mouse femur at P21. Scale bar, 200  $\mu$ m (upper) and 50  $\mu$ m (lower).

(B & C) Terminal deoxynucleotidyl transferase dUTP nick end labeling (TUNEL) assay and quantification of WT and *Prrx1<sup>Cre</sup>;Mettl1<sup>fl/fl</sup>* mouse humerus at P9. Scale bar, 200  $\mu$ m. n = 3.

(D) Representative Alcian blue/von kossa staining of WT and *Prrx1<sup>Cre</sup>;Mettl1<sup>fl/fl</sup>* mouse humerus at E18.5. Scale bar, 100  $\mu$ m.

Data are expressed as mean  $\pm$  s.e.m; *P* value was calculated by two-tailed Student's *t* test. ns, not significant.

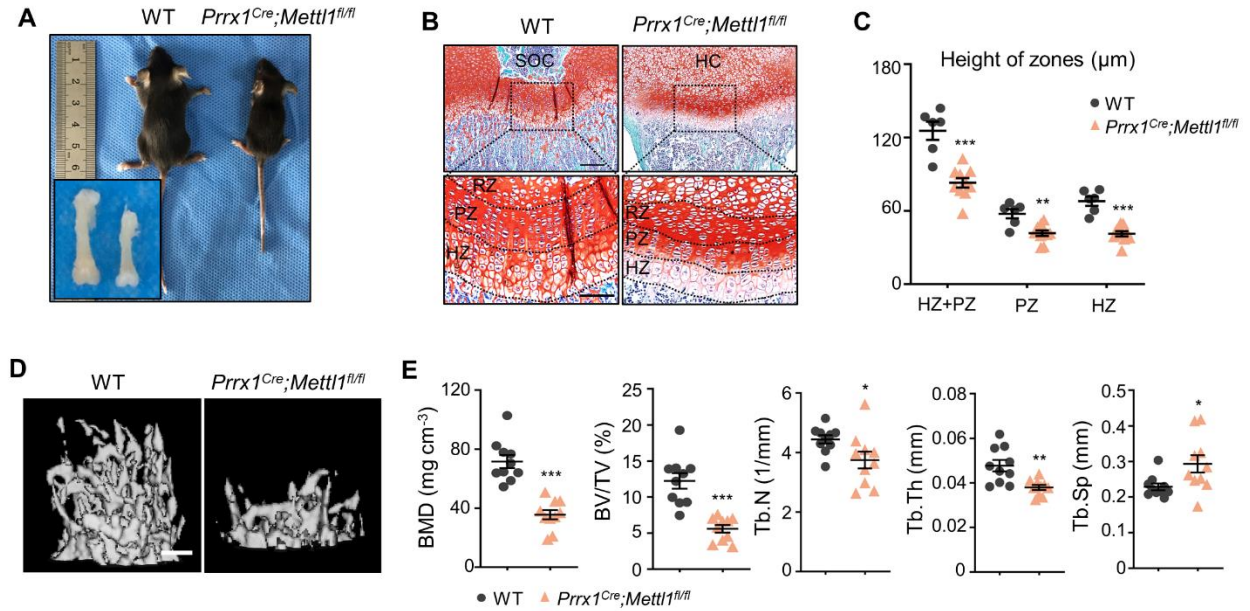

**Figure S5 Deletion of *Mettl1* inhibits bone growth and reduces bone mass**

(A) Representative images of WT and *Prrx1<sup>Cre</sup>;Mettl1<sup>fl/fl</sup>* mice at 3 weeks of age. Inserted image was femur of WT and *Prrx1<sup>Cre</sup>;Mettl1<sup>fl/fl</sup>* mice.

(B & C) Representative Safranin O staining and quantification of WT and *Prrx1<sup>Cre</sup>;Mettl1<sup>fl/fl</sup>* mouse growth plate of the distal femur at 3 weeks of age. Boxed areas were magnified. SOC, secondary ossification center; RZ, resting zone; PZ, proliferating zone; HZ, hypertrophic zone. Scale bar, 100 μm (upper) and 50 μm (lower). n = 6 for WT and n = 10 for *Prrx1<sup>Cre</sup>;Mettl1<sup>fl/fl</sup>*.

(D & E) Representative μCT images and quantification of femurs from WT and *Prrx1<sup>Cre</sup>;Mettl1<sup>fl/fl</sup>* mice at 3 weeks of age. Scale bar, 200 μm. n = 10.

Data are expressed as mean ± s.e.m; \* $P < 0.05$ , \*\* $P < 0.01$ , \*\*\* $P < 0.001$  by two-tailed Student's *t* test.

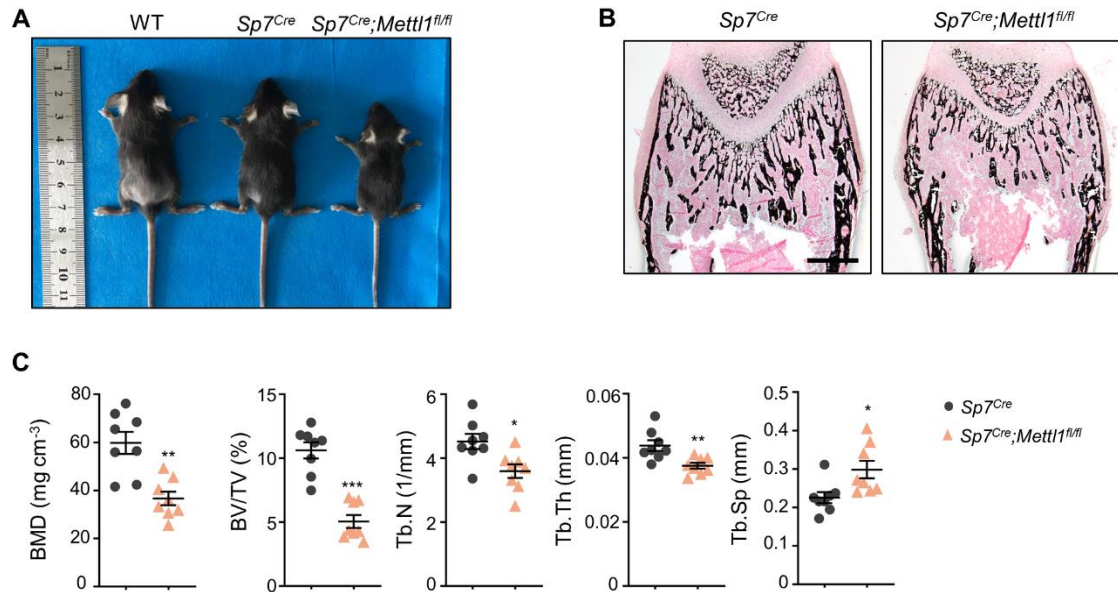

**Figure S6 Deletion of *Mettl1* in osteoblast precursors inhibits bone growth**

(A) Representative images of WT, *Sp7<sup>Cre</sup>* and *Sp7<sup>Cre</sup>;Mettl1<sup>fl/fl</sup>* mice at 3 weeks of age.

(B) Representative von kossa staining of femurs from *Sp7<sup>Cre</sup>* and *Sp7<sup>Cre</sup>;Mettl1<sup>fl/fl</sup>* mice at 3 weeks of age. Scale bar, 200  $\mu$ m.

(C) Representative  $\mu$ CT quantification of femurs from *Sp7<sup>Cre</sup>* and *Sp7<sup>Cre</sup>;Mettl1<sup>fl/fl</sup>* mice at 3 weeks of age. n = 8.

Data are expressed as mean  $\pm$  s.e.m; \* $P$  < 0.05, \*\* $P$  < 0.01, \*\*\* $P$  < 0.001 by two-tailed Student's  $t$  test.

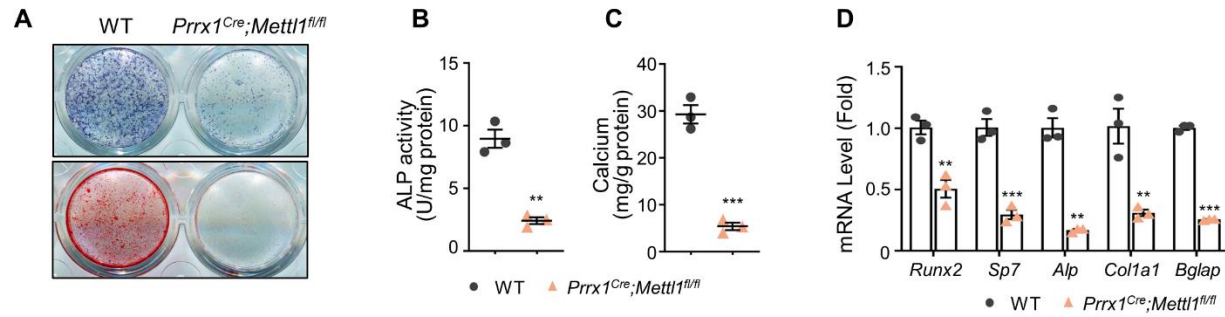

### Figure S7 Deletion of *Mettl1* inhibits osteogenesis

(A-C) Representative images and quantification of alkaline phosphatase (ALP) and alizarin red S (ARS) staining of bone marrow SSCs isolated from WT and *Prrx1<sup>Cre</sup>;Mettl1<sup>fl/fl</sup>* mice at 3 weeks of age. n = 3 from independent experiments.

(D) qRT-PCR analyses of the expression of *Runx2*, *Sp7*, *Alp*, *Col1a1* and *Bglap* after osteogenic induction of WT and *Prrx1<sup>Cre</sup>;Mettl1<sup>fl/fl</sup>* SSCs for 5 days. n = 3 from independent experiments.

Data are expressed as mean  $\pm$  s.e.m; \* $P < 0.05$ , \*\* $P < 0.01$ , \*\*\* $P < 0.001$  by two-tailed Student's *t* test.



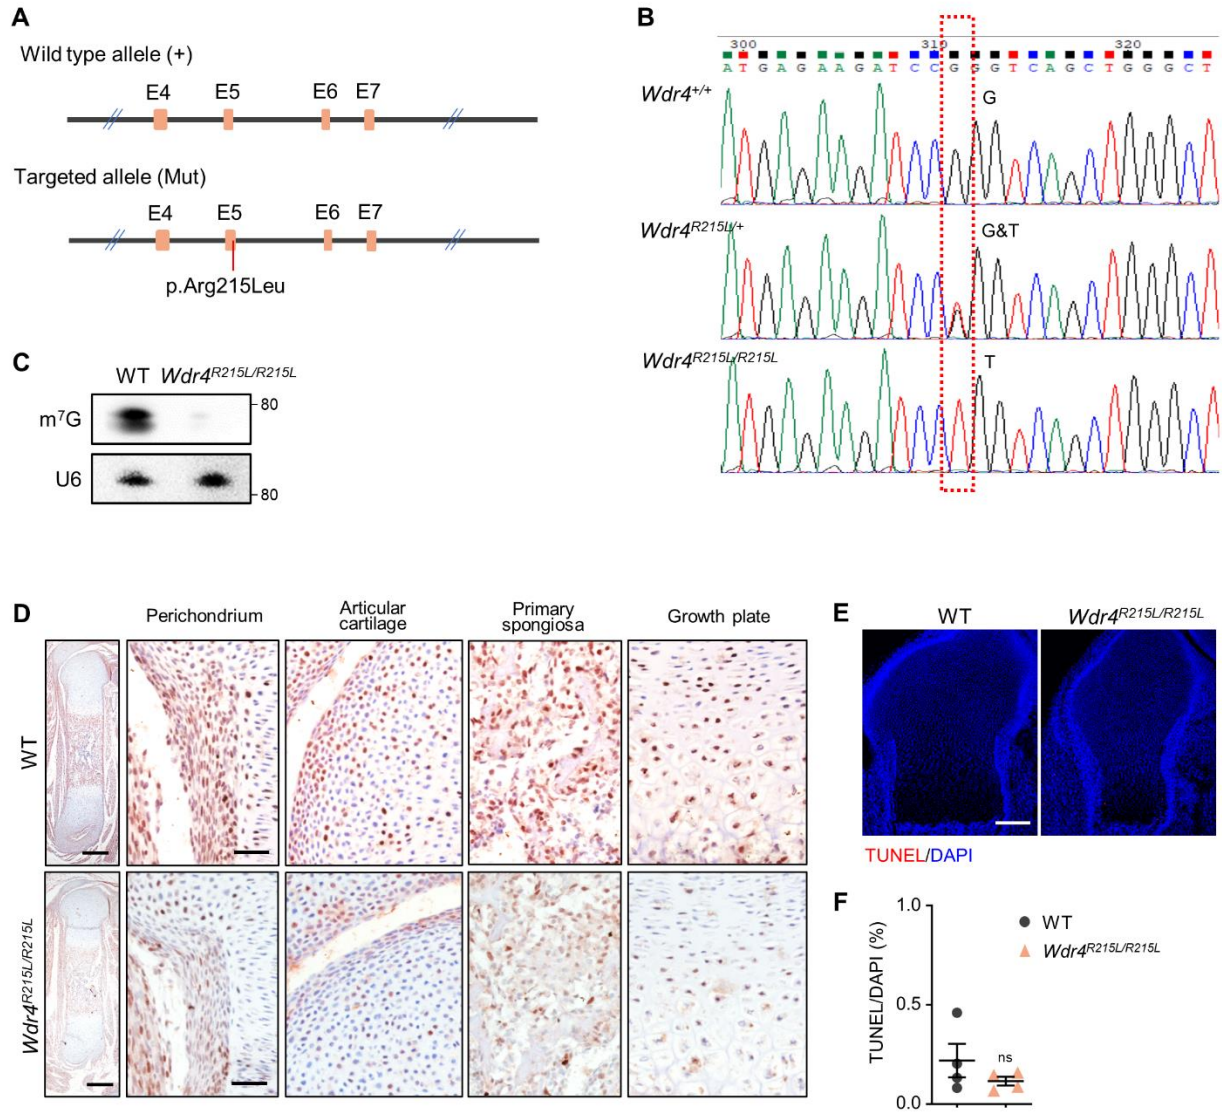

### Figure S8 Construction of *Wdr4*<sup>R215L/R215L</sup> mice

(A) Schematic representation of *Wdr4* mutation.

(B) Representative DNA sequencing results of WT, *Wdr4*<sup>R215L/+</sup> and *Wdr4*<sup>R215L/R215L</sup> mice. Boxed areas were mutation site.

(C) m<sup>7</sup>G northwestern blot of WT and *Wdr4*<sup>R215L/+</sup> mouse limb mesenchymal progenitors. U6 snRNA was used as loading control.

(D) Representative immunohistological staining of METTL1 in WT and *Wdr4*<sup>R215L/R215L</sup> mouse femur at P0. Scale bar, 200  $\mu$ m (left) and 20  $\mu$ m (right).

(E & F) TUNEL assay and quantification of WT and *Wdr4*<sup>R215L/R215L</sup> mouse femur at E18.5. Scale bar, 200  $\mu$ m.

Data are expressed as mean  $\pm$  s.e.m; *P* value was calculated by two-tailed Student's *t* test. ns, not significant.

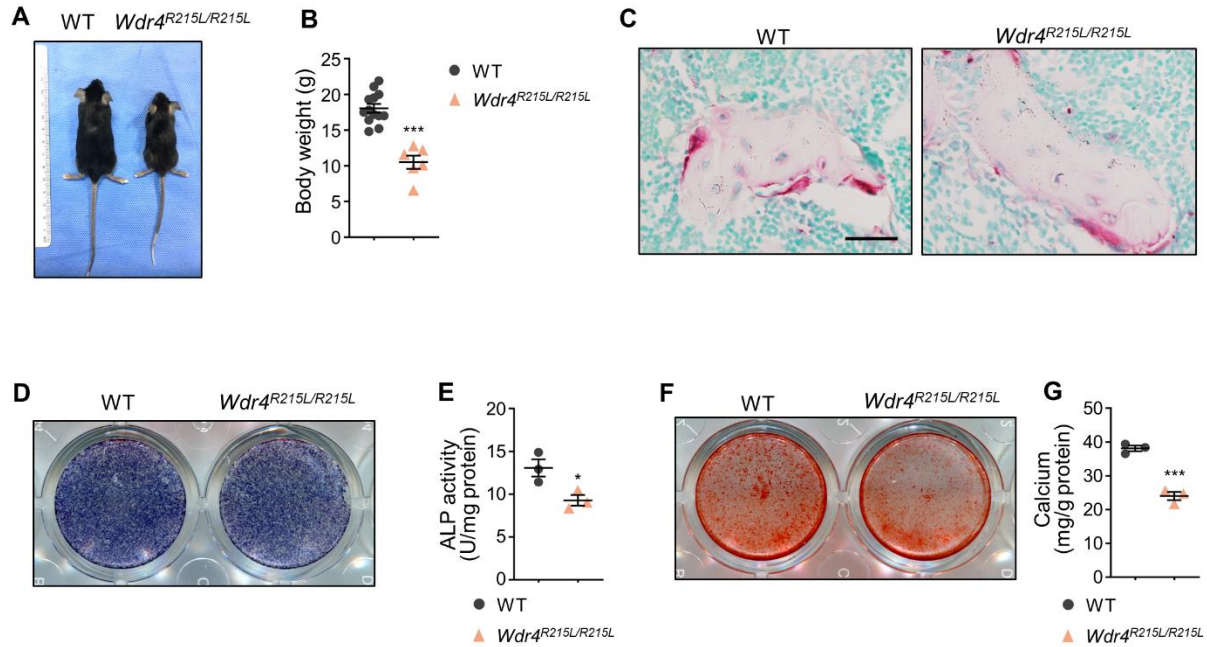

**Figure S9 Homozygous *Wdr4*<sup>R215L</sup> mutation inhibits osteogenesis**

(A & B) Representative image and body weight of WT and *Wdr4*<sup>R215L/R215L</sup> mice at 6 weeks of age. n = 13 for WT and n = 6 for *Wdr4*<sup>R215L/R215L</sup> mice.

(C) Representative TRAP staining of WT and *Wdr4*<sup>R215L/R215L</sup> mouse femur at 6 weeks of age. Scale bar, 20  $\mu$ m.

(D-G) Representative images and quantification of ALP and ARS staining of bone marrow SSCs isolated from WT and *Wdr4*<sup>R215L/R215L</sup> mice at 6 weeks of age. n = 3 from independent experiments. Data are expressed as mean  $\pm$  s.e.m; \**P* < 0.05, \*\**P* < 0.01, \*\*\**P* < 0.001 by two-tailed Student's *t* test.

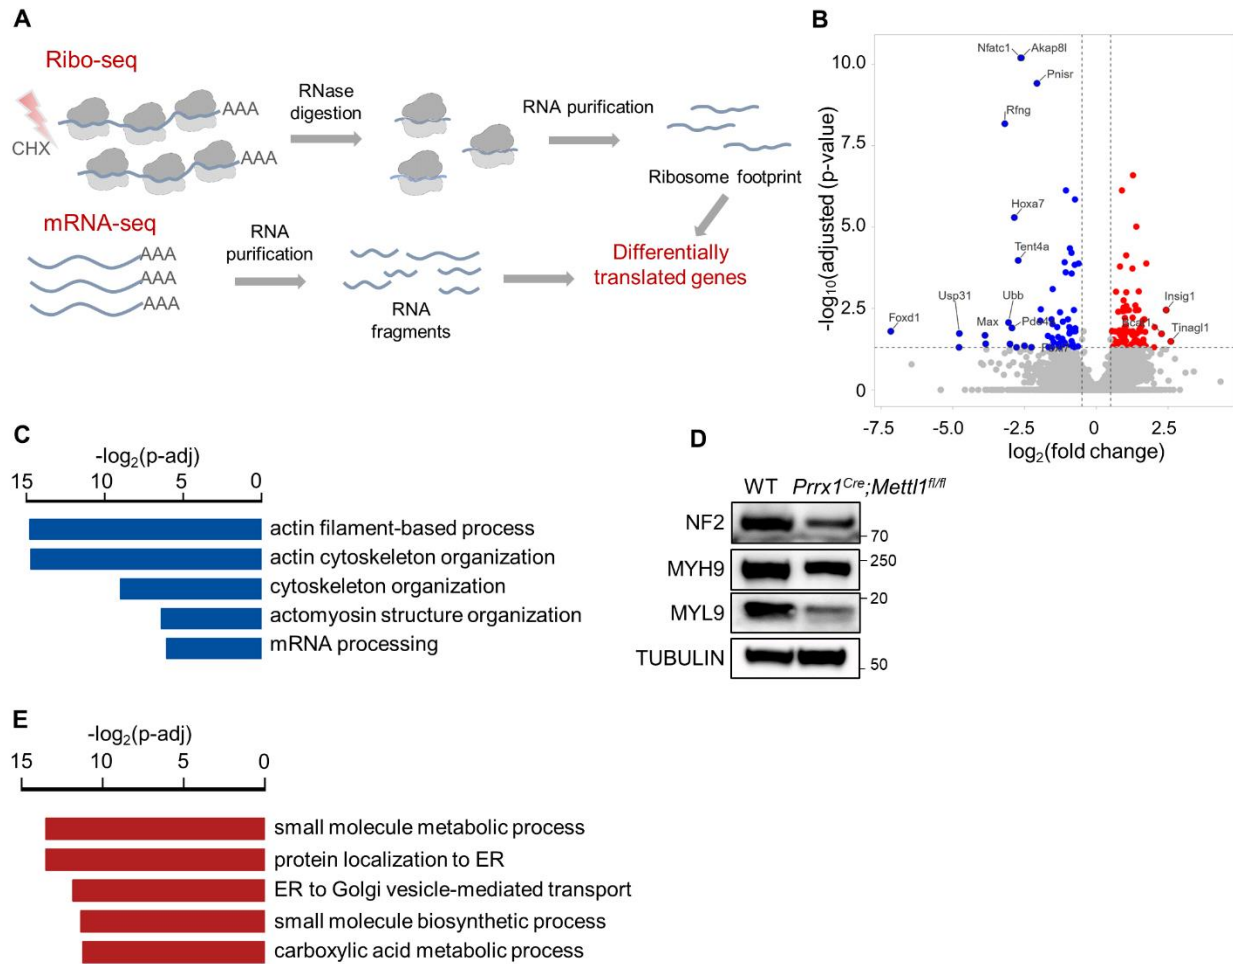

**Figure S10 Ribosome profiling of *Mettl1*-deficient cells**

(A) Schematic representation of ribosome profiling.

(B) Volcano plot of differentially translated genes in *Prrx1*<sup>Cre</sup>;*Mettl1*<sup>fl/fl</sup> limb mesenchymal progenitors at E14.5.

(C) Gene ontology (GO) analysis of down-translated genes in *Prrx1*<sup>Cre</sup>;*Mettl1*<sup>fl/fl</sup> limb mesenchymal progenitors.

(D) Western blot analysis of cytoskeleton proteins in WT and *Prrx1*<sup>Cre</sup>;*Mettl1*<sup>fl/fl</sup> chondrocytes.

(E) GO analysis of up-translated genes in *Prrx1*<sup>Cre</sup>;*Mettl1*<sup>fl/fl</sup> limb mesenchymal progenitors.

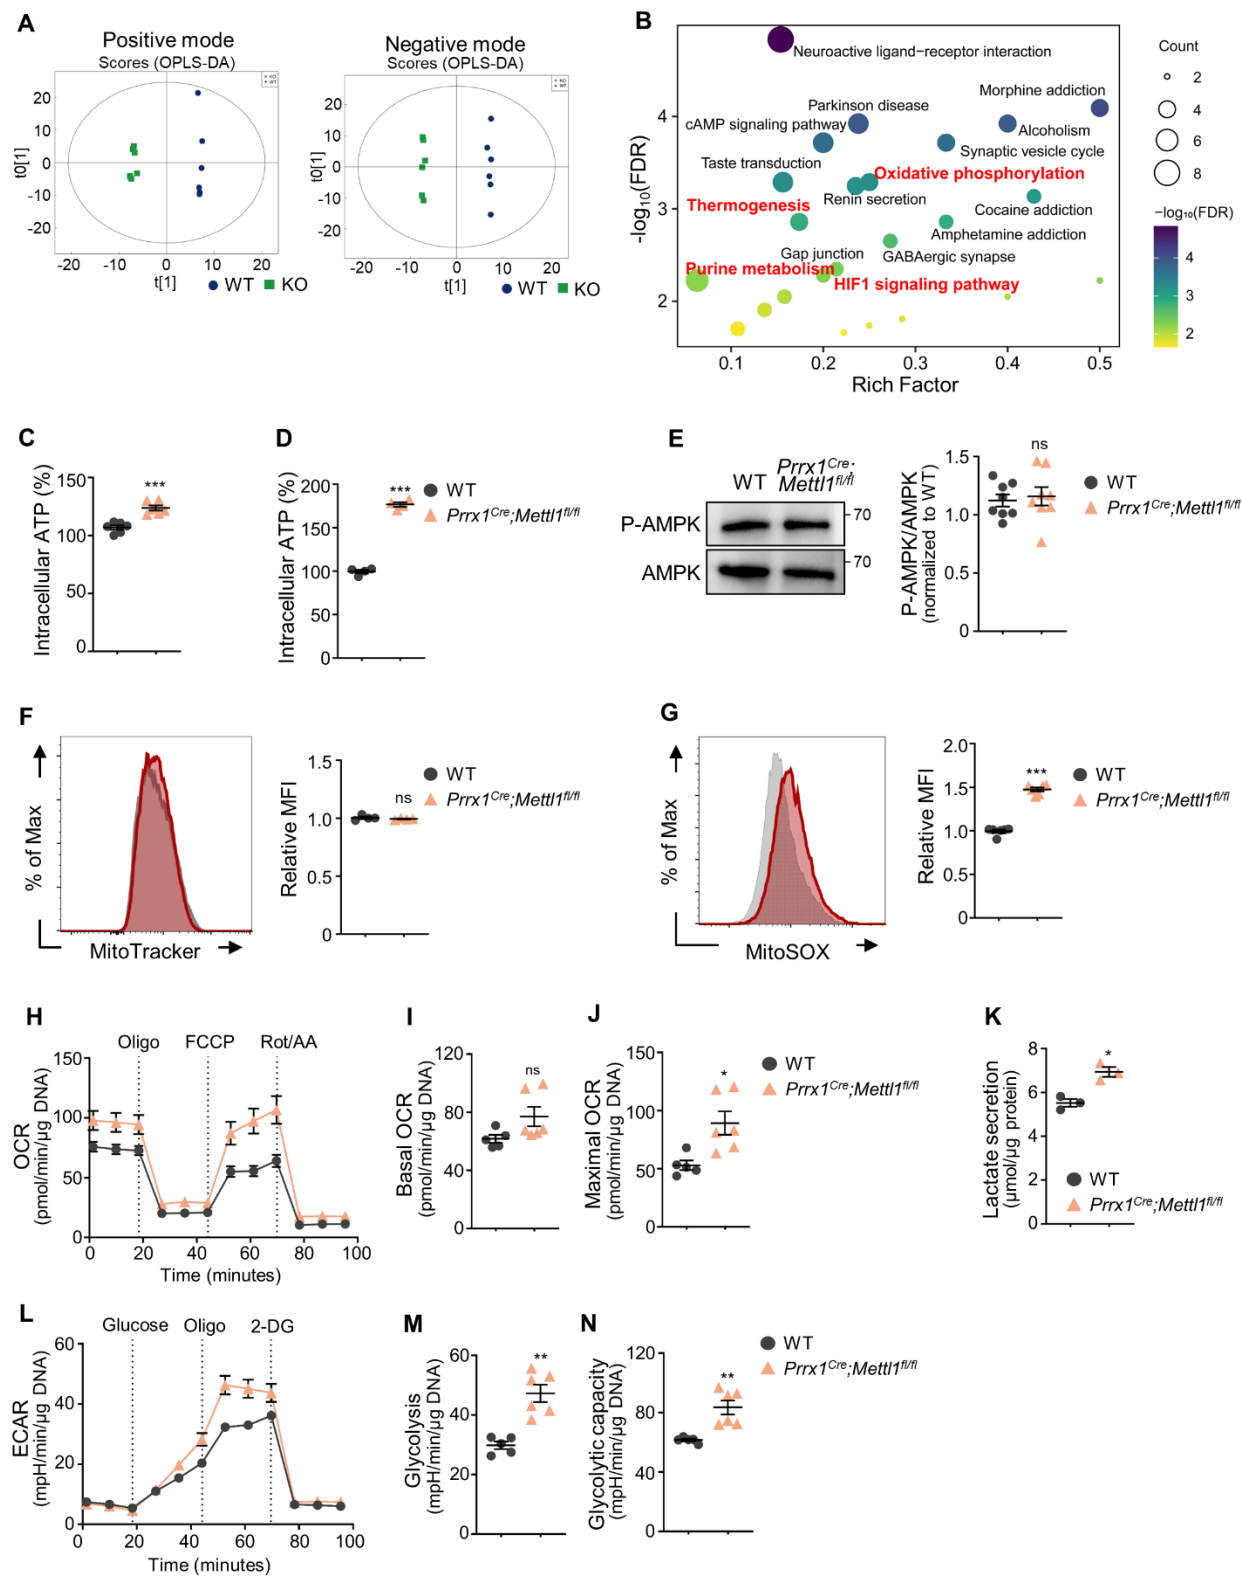

**Figure S11 *Mettl1* deletion promotes cellular respiration**

(A) OPLS-DA analysis of WT and *Prrx1<sup>Cre</sup>;Mettl1<sup>fl/fl</sup>* group.

(B) Pathway enrichment analysis of differential metabolites upon *Mettl1* removal.

(C) Quantification of intracellular ATP levels in WT and *Prrx1<sup>Cre</sup>;Mettl1<sup>fl/fl</sup>* limb mesenchymal progenitors at E14.5. n = 6.

(D) Quantification of intracellular ATP levels in WT and *Prrx1<sup>Cre</sup>;Mettl1<sup>fl/fl</sup>* chondrocytes at P0. n = 4.

(E) Western blot analysis and quantification of phospho-AMPK and AMPK levels. n = 8.

(F) Flow cytometry analysis of WT and *Prrx1<sup>Cre</sup>;Mettl1<sup>fl/fl</sup>* cells stained with MitoTracker. n = 4.

(G) Flow cytometry analysis of WT and *Prrx1<sup>Cre</sup>;Mettl1<sup>fl/fl</sup>* cells stained with MitoSOX. n = 6.

(H-J) Representative graph of oxygen consumption rate (OCR) and quantification at baseline and with indicated drugs. Oligo, oligomycin; FCCP, Carbonyl cyanide-4 (trifluoromethoxy) Phenylhydrazone; Rot/AA, rotenone and antimycin A. n = 5 (WT) or 6 (*Prrx1<sup>Cre</sup>;Mettl1<sup>fl/fl</sup>*).

(K) Quantification of lactate secretion in WT and *Prrx1<sup>Cre</sup>;Mettl1<sup>fl/fl</sup>* limb mesenchymal progenitors.

(L-N) Representative graph of extracellular acidification rate (ECAR) and quantification at baseline and with indicated drugs. 2-DG, 2-deoxy-glucose. n = 5 (WT) or 6 (*Prrx1<sup>Cre</sup>;Mettl1<sup>fl/fl</sup>*).

Data are expressed as mean  $\pm$  s.e.m; \* $P < 0.05$ , \*\* $P < 0.01$ , \*\*\* $P < 0.001$  by two-tailed Student's *t* test. ns, not significant.



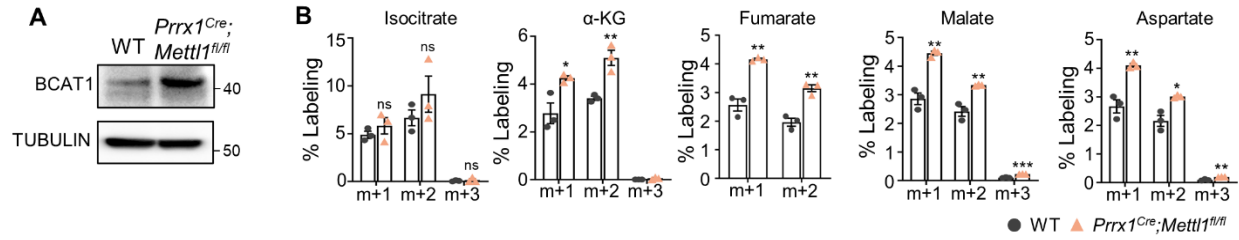

### Figure S12 *Mettl1* deletion promotes BCAA catabolism

(A) Western blot analysis of BCAT1 levels in WT and *Prrx1<sup>Cre</sup>; Mettl1<sup>fl/fl</sup>* limb mesenchymal progenitors.

(B) Abundance of  $^{13}\text{C}$ -labeled intermediate metabolites in TCA cycle of cells treated with  $^{13}\text{C}$ ,  $^{15}\text{N}$ -L-Leucine.  $n = 3$ . Data are expressed as mean  $\pm$  s.e.m; \* $P < 0.05$ , \*\* $P < 0.01$ , \*\*\* $P < 0.001$  by two-tailed Student's  $t$  test. ns, not significant.

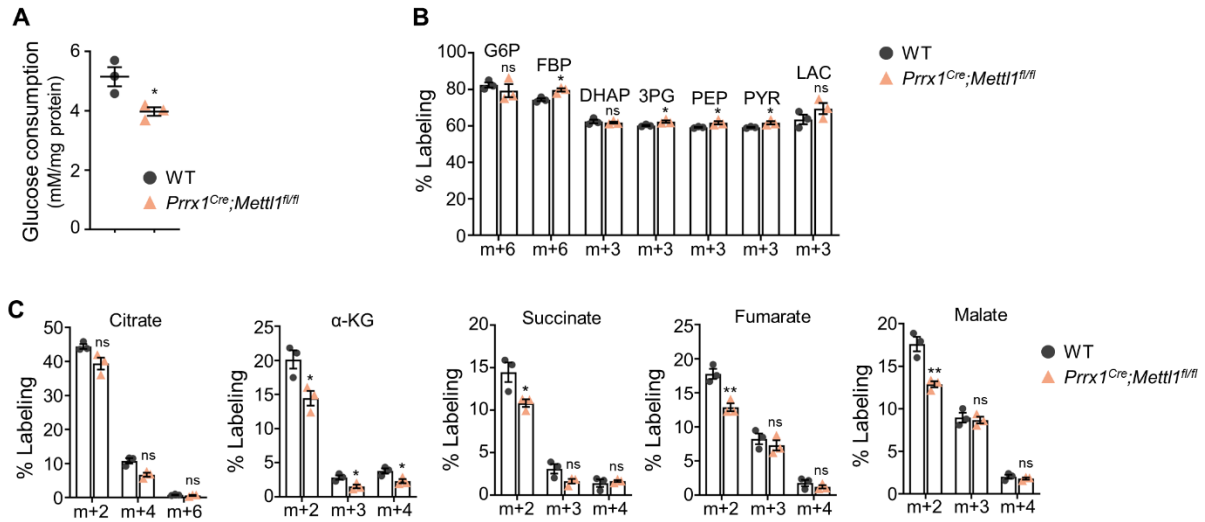

**Figure S13 *Mettl1* deletion inhibits glucose metabolism**

(A) Measurement of glucose consumption in WT and *Prrx1<sup>Cre</sup>;Mettl1<sup>fl/fl</sup>* limb mesenchymal progenitors at E14.5. n = 3 from independent experiments.

(B) Abundance of  $^{13}\text{C}$ -labeled glycolytic metabolites of cells treated with  $^{13}\text{C}$ -glucose. n = 3.

(C) Abundance of  $^{13}\text{C}$ -labeled intermediate metabolites in TCA cycle of cells treated with  $^{13}\text{C}$ -glucose. n = 3.

Data are expressed as mean  $\pm$  s.e.m; \* $P < 0.05$ , \*\* $P < 0.01$ , \*\*\* $P < 0.001$  by two-tailed Student's *t* test. ns, not significant.

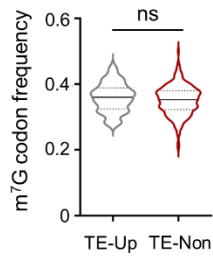

**Figure S14 Codon frequency analysis of m<sup>7</sup>G-tRNA decoded codons**

Frequency analysis of m<sup>7</sup>G-tRNA decoded codons in genes with increased translation (TE-up) and without translational change (TE-none) in *Prrx1<sup>Cre</sup>;Mettl1<sup>fl/fl</sup>* limb mesenchymal progenitors. *P* value was calculated by Mann–Whitney U test. ns, not significant.

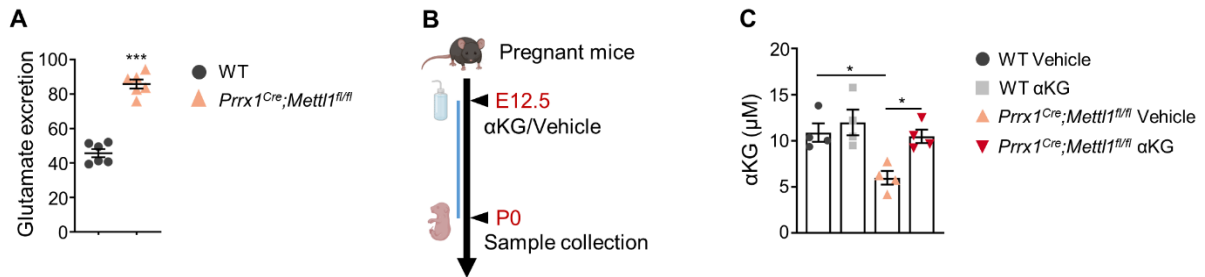

### Figure S15 Supplementation of αKG to pregnant mice

(A) Measure of glutamate level in culture medium of WT and *Prrx1<sup>Cre</sup>;Mettl1<sup>fl/fl</sup>* limb mesenchymal progenitors. n = 6.

(B) Schematic representation of αKG supplementation.

(C) Measure of αKG level of cartilage tissue isolated from WT and *Prrx1<sup>Cre</sup>;Mettl1<sup>fl/fl</sup>* newborn mouse, supplemented with vehicle or αKG.

Data are expressed as mean ± s.e.m; \* $P < 0.05$ , \*\* $P < 0.01$ , \*\*\* $P < 0.001$  by two-tailed Student's  $t$  test (A) or one-way ANOVA with Tukey's post hoc test (C).

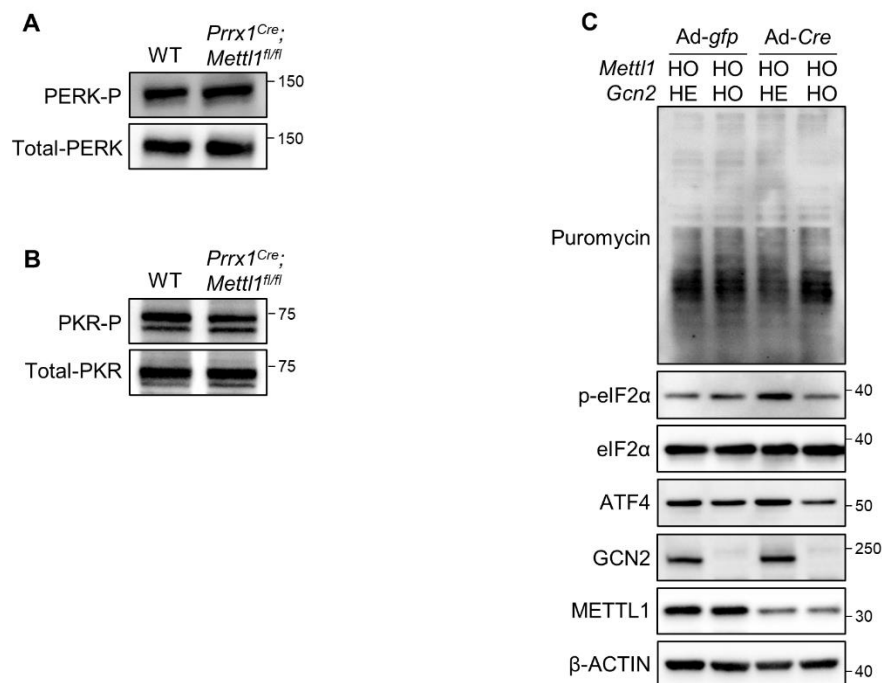

### Figure S16 *Mettl1* removal activates ISR via GCN2

(A) Western blot analysis of phospho-PERK and PERK levels in WT and *Prrx1<sup>Cre</sup>;*Mettl1<sup>fl/fl</sup>** limb mesenchymal progenitors.

(B) Western blot analysis of phospho-PKR and PKR levels in WT and *Prrx1<sup>Cre</sup>;*Mettl1<sup>fl/fl</sup>** limb mesenchymal progenitors.

(C) Western blot analysis of ISR signaling and puromycin incorporation into nascent peptides in bone marrow SSCs isolated from *Mettl1<sup>fl/fl</sup>;*Gcn2<sup>+/-</sup>** and *Mettl1<sup>fl/fl</sup>;*Gcn2<sup>-/-</sup>** mice at 4 weeks of age, and infected with Ad-gfp or Ad-Cre. HE, heterozygous; HO, homozygous.



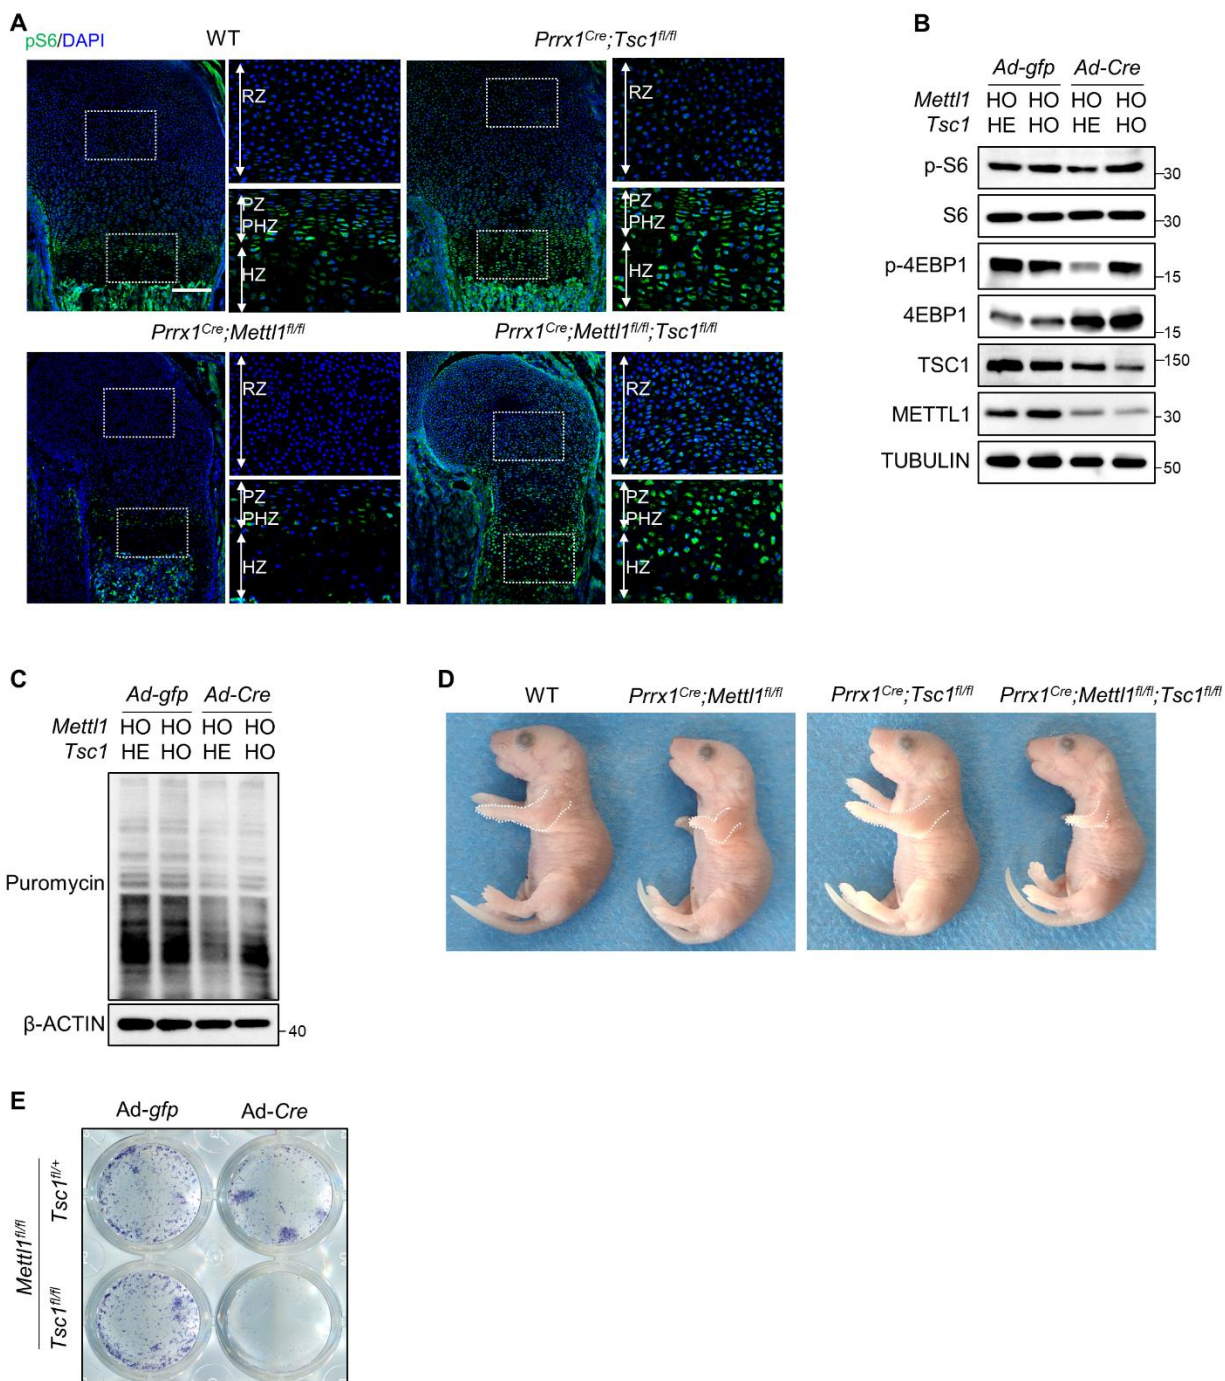

**Figure S17 Promoting translation by mTORC1 activation aggravates bone defect of *Mettl1*-knockout mice**

(A) Immunostaining of phospho-S6 in WT, *Prrx1<sup>Cre</sup>;Tsc1<sup>fl/fl</sup>*, *Prrx1<sup>Cre</sup>;Mettl1<sup>fl/fl</sup>* and *Prrx1<sup>Cre</sup>;Mettl1<sup>fl/fl</sup>;Tsc1<sup>fl/fl</sup>* mouse humerus at P0. Boxed areas were magnified. RZ, resting zone; PZ, proliferating zone; PHZ, pre-hypertrophic zone; HZ, hypertrophic zone. Scale bar, 200  $\mu$ m.

(B) Western blot analysis of S6, p-S6, 4EBP1, p-4EBP1, TSC and METTL1 in bone marrow SSCs isolated from *Mettl1<sup>fl/fl</sup>;Tsc1<sup>fl/+</sup>* and *Mettl1<sup>fl/fl</sup>;Tsc1<sup>fl/fl</sup>* mice at 4 weeks of age, and infected with Ad-gfp or Ad-Cre. HE, heterozygous; HO, homozygous.

(C) Western blot analysis of puromycin incorporation into nascent peptides in bone marrow SSCs isolated from *Mettl1<sup>fl/fl</sup>;Tsc1<sup>fl/+</sup>* and *Mettl1<sup>fl/fl</sup>;Tsc1<sup>fl/fl</sup>* mice at 4 weeks of age, and infected with Ad-*gfp* or Ad-*Cre*. HE, heterozygous; HO, homozygous.

(D) Representative images of WT, *Prrx1<sup>Cre</sup>;Tsc1<sup>fl/fl</sup>*, *Prrx1<sup>Cre</sup>;Mettl1<sup>fl/fl</sup>* and *Prrx1<sup>Cre</sup>;Mettl1<sup>fl/fl</sup>;Tsc1<sup>fl/fl</sup>* mice at P0.

(E) Representative images of ALP staining of bone marrow SSCs isolated from *Mettl1<sup>fl/fl</sup>;Tsc1<sup>fl/+</sup>* and *Mettl1<sup>fl/fl</sup>;Tsc1<sup>fl/fl</sup>* mice at 4 weeks of age, and infected with Ad-*gfp* or Ad-*Cre*.

**Supplementary Table 1**

| <b>Genes</b>                                          | <b>Primers</b> | <b>Sequence (5'-3')</b>    | <b>Product size</b>         |
|-------------------------------------------------------|----------------|----------------------------|-----------------------------|
| <i>Prrx1</i> <sup>Cre/Sp7</sup> <sup>Cre</sup><br>WT  | Forward        | ACTGGGATCTTCGAACTCTTTGGAC  | WT = 397 bp                 |
|                                                       | Reverse        | GATGTTGGGGCACTGCTCATTACACC |                             |
| <i>Prrx1</i> <sup>Cre/Sp7</sup> <sup>Cre</sup><br>Mut | Forward        | CCATCTGCCACCAGCCAG         | Mut = ~300 bp               |
|                                                       | Reverse        | TCGCCATCTTCCAGCAGG         |                             |
| <i>Mettl1</i> -flox                                   | Forward        | ATACACACTCCTGGCCACTCCTTGT  | WT = 379 bp<br>Mut = 465 bp |
|                                                       | Reverse        | CCCTGGCTTCTAGGGTGTGAATCAG  |                             |
| <i>Wdr4</i> p.mut                                     | Forward        | GGGAGCGGTGCAGCAGGTAT       | WT = 585 bp<br>Mut = 585 bp |
|                                                       | Reverse        | GCAGCCCACAGCCCTGGATT       |                             |
| <i>Gcn2</i> WT                                        | Forward        | AAGCACTCAAGAAGCTGACATCACC  | WT = 321 bp                 |
|                                                       | Reverse        | ATCTATGCACGCTCTCTCAAGAAGC  |                             |
| <i>Gcn2</i> Mut                                       | Forward        | GATCATCTGCCCTCTAGTCTGTATG  | Mut = 273 bp                |
|                                                       | Reverse        | TGTAGCCTGTCATCTCCATTCCTAG  |                             |
| <i>Tsc1</i> -flox                                     | Forward        | GTCACGACCGTAGGAGAAGC       | WT = 193 bp<br>Mut = 230 bp |
|                                                       | Reverse        | GAATCAACCCCACAGAGCAT       |                             |

**Supplementary Table 2**

| <b>Genes</b> | <b>Sequence</b>       |
|--------------|-----------------------|
| tRNA-Val-AAC | TGTTTCCGCCCCGGTTTCGAA |
| tRNA-Lys-CTT | AACGTGGGGCTCGAACCCAC  |
| U6 snoRNA    | TGGAACGCTTCACGAATTG   |

**Supplementary Table 3**

| <b>Genes</b>   | <b>Primers</b> | <b>Sequence (5'-3')</b>     |
|----------------|----------------|-----------------------------|
| <i>Gapdh</i>   | Forward        | TCATTGACCTCAACTACATG        |
|                | Reverse        | TCGCTCCTGGAAGATGGTGAT       |
| <i>Runx2</i>   | Forward        | GGTACTTCGTCAGCATCCTATCAG    |
|                | Common         | GCTTCCGTCAGCGTCAACAC        |
| <i>Sp7</i>     | Forward        | ATGGCGTCCTCTCTGCTTG         |
|                | Reverse        | TGAAAGGTCAGCGTATGGCTT       |
| <i>Bglap</i>   | Forward        | TTGGTGCACACCTAGCAGAC        |
|                | Reverse        | ACCTTATTGCCCTCCTGCTT        |
| <i>Alp</i>     | Forward        | AACCCAGACACAAGCATTCC        |
|                | Reverse        | GCCTTTGAGGTTTTTGGTCA        |
| <i>Colla1</i>  | Forward        | TAGGCCATTGTGTATGCAGC        |
|                | Reverse        | ACATGTTCAGCTTTGTGGACC       |
| <i>Col2a1</i>  | Forward        | AGAACATCACCTACCACTGTAAGAACA |
|                | Reverse        | TGACGGTCTTGCCCCACTT         |
| <i>Col10a1</i> | Forward        | CCTTTCTGCTGCTAATGTTCTTGA    |
|                | Reverse        | ATGCCTTGTTCTCCTCTTACTGGA    |
| <i>Mmp13</i>   | Forward        | ACTTCTACCCATTTGATGGACCTT    |
|                | Reverse        | AAGCTCATGGGCAGCAACA         |



## Supplemental Methods

| Antibodies                                              | Source            | Catalog                             |
|---------------------------------------------------------|-------------------|-------------------------------------|
| METTL1                                                  | Proteintech       | Cat #:14994-1-AP; RRID: AB_2142013  |
| Col10                                                   | Abcam             | Cat #: ab58632; RRID: AB_879742     |
| MMP13                                                   | Abcam             | Cat #: ab39012; RRID:AB_776416      |
| Sp7                                                     | Abcam             | Cat #: ab209484; RRID:AB_2892207    |
| TUBULIN                                                 | Proteintech       | Cat #: 11224-1-AP; RRID:AB_2210206  |
| WDR4                                                    | Proteintech       | Cat #: 14766-1-AP; RRID:AB_2215387  |
| Puromycin                                               | Millipore         | Cat #: MABE343; RRID:AB_2566826     |
| 7-methylguanosine (m7G)                                 | MBL International | Cat #: RN017M; RRID:AB_2725740      |
| Phospho-eIF2 $\alpha$ (Ser51)                           | CST               | Cat #: 3398; RRID:AB_2096481        |
| eIF2 $\alpha$                                           | CST               | Cat #: 5324; RRID:AB_10692650       |
| ATF4                                                    | Huabio            | Cat #: ET1612-37                    |
| Phospho-GCN2                                            | Abcam             | Cat #: 75836; RRID:AB_1310260       |
| GCN2                                                    | CST               | Cat #: 3302S; RRID: AB_2277617      |
| Phospho-PERK                                            | Immunoway         | Cat #: YP1005                       |
| PERK                                                    | CST               | Cat #: 3192S; RRID:AB_2095847       |
| Phospho-PKR                                             | Abcam             | Cat #: 32036; RRID:AB_777310        |
| PKR                                                     | Proteintech       | Cat #: 18244-1-AP; RRID:AB_2246451  |
| $\beta$ -ACTIN                                          | Proteintech       | Cat #: 20536-1-AP; RRID:AB_10700003 |
| Phospho-S6 Ribosomal Protein<br>(Ser235/236) (D57.2.2E) | CST               | Cat #: 4858; RRID:AB_916156         |
| Ribosome Protein S6                                     | Santa cruz        | Cat #: sc-74459; RRID:AB_1129205    |
| Phospho-4E-BP1 (Thr37/46)<br>(236B4)                    | CST               | Cat #: 2855; RRID:AB_56083          |
| 4EBP1                                                   | Huabio            | Cat #: ER62532                      |

|                                                     |                            |                                     |
|-----------------------------------------------------|----------------------------|-------------------------------------|
| TSC1                                                | Proteintech                | Cat #: 29906-1-AP; RRID:AB_2918352  |
| phospho-AMPK $\alpha$ (Thr172)                      | CST                        | Cat #: 2535; RRID:AB_331250         |
| AMPK $\alpha$                                       | CST                        | Cat #: 2532; RRID:AB_330331         |
| BCAT1                                               | Proteintech                | Cat #: 13640-1-AP; RRID:AB_2063569  |
| NF2                                                 | Proteintech                | Cat #: 21686-1-AP; RRID:AB_10792410 |
| MYL9                                                | Proteintech                | Cat #: 15354-1-AP; RRID:AB_2147773  |
| MYH9                                                | Proteintech                | Cat #: 11128-1-AP; RRID:AB_2147294  |
| Alexa Fluor 488 Phalloidin                          | Thermo Fisher Scientific   | Cat #: A12379; RRID:AB_2315147      |
| Goat anti-Rabbit IgG secondary Ab<br>HRP conjugated | Signalway                  | Cat #: L3012; RRID:AB_895483        |
| Goat anti-mouse IgG secondary Ab<br>HRP conjugated  | Signalway                  | Cat #: L3032; RRID:AB_895481        |
| Goat Anti-rabbit IgG (Cy3)                          | The Jackson ImmunoResearch | Cat #: 111-165-003; RRID:AB_2338000 |
| Goat Anti-rabbit IgG (Alexa<br>Fluor® 488)          | The Jackson ImmunoResearch | Cat #: 111-545-003; RRID:AB_2338046 |
| Goat Anti-rabbit IgG (Alexa<br>Fluor® 647)          | The Jackson ImmunoResearch | Cat #: 111-605-003; RRID:AB_2338072 |

---

### **Bacterial and virus strains**

|           |          |     |
|-----------|----------|-----|
| Adeno-Cre | Genechem | N/A |
| Adeno-gfp | Genechem | N/A |

---

### **Chemicals, peptides and recombinant proteins**

|                         |               |           |
|-------------------------|---------------|-----------|
| Puromycin               | Sigma-Aldrich | Cat#P8833 |
| Cycloheximide           | Sigma-Aldrich | Cat#C7698 |
| Alpha-ketoglutaric acid | Sigma-Aldrich | Cat#K1128 |

|                                  |                     |               |
|----------------------------------|---------------------|---------------|
| Alcian blue 8GX                  | Solarbio            | Cat# A8140    |
| Alizarin S                       | Sigma-Aldrich       | Cat#A5533     |
| EdU                              | Carbosynth          | Cat#NE08701   |
| Sulfo-Cyanine3 azide             | Lumiprobe           | Cat#D1330     |
| Collagenase type II              | Worthington-Biochem | Cat#LS004176  |
| Dispase I                        | Sigma-Aldrich       | Cat#D4693     |
| Safranin O                       | Sigma-Aldrich       | Cat#S2255     |
| Fast Green                       | Sigma-Aldrich       | Cat#F7252     |
| Silver nitrate                   | Sigma-Aldrich       | Cat#85193     |
| Mitotracker Red CMXRos           | Yeasen              | Cat#40741ES50 |
| MitoSOX                          | Invitrogen          | Cat#M36008    |
| TRIzol reagent                   | Invitrogen          | Cat#15596026  |
| NSC23766 trihydrochloride        | MedChemExpress      | Cat#HY-15723A |
| CN04 (Rho/Rac/Cdc42 Activator I) | Cytoskeleton        | Cat#CN04-A    |

---

### Critical commercial assays

---

|                                             |                          |              |
|---------------------------------------------|--------------------------|--------------|
| TUNEL assay kit                             | Promega                  | Cat#G3250    |
| BCIP/NBT staining kit                       | Beyotime                 | Cat#C3206    |
| ALP assay kit                               | Beyotime                 | Cat#P0321    |
| PrimeScript RT reagent Kit with gDNA Eraser | Takara                   | Cat#RR047A   |
| SYBR Premix Ex Taq II                       | Takara                   | Cat#1725121  |
|                                             | Nanjing jiancheng        |              |
| Glucose assay kit                           | Bioengineering Institute | Cat#F006-1-1 |
| aKG assay kit                               | Abcam                    | Cat#ab83431  |

|                                       |          |                |
|---------------------------------------|----------|----------------|
| Alcian blue staining kit              | Solarbio | Cat#G1560      |
| H&E staining kit                      | Solarbio | Cat#G1120      |
| Seahorse XF cell mito stress test kit | Agilent  | Cat#103015-100 |
| Seahorse XF glycolytic rate assay kit | Agilent  | Cat#103344-100 |

---

### Deposited data

|                                                                                                 |            |                                                                                                         |
|-------------------------------------------------------------------------------------------------|------------|---------------------------------------------------------------------------------------------------------|
| TRAC-seq of limb progenitors from WT and <i>Prrxl<sup>Cre</sup>;Mettl1<sup>fl/fl</sup></i> mice | This paper | <a href="https://ngdc.cnbc.ac.cn/gsa/browse/CRA012901">https://ngdc.cnbc.ac.cn/gsa/browse/CRA012901</a> |
| Ribosome profiling results                                                                      | This paper | <a href="https://ngdc.cnbc.ac.cn/gsa/browse/CRA012883">https://ngdc.cnbc.ac.cn/gsa/browse/CRA012883</a> |
| Untargeted metabolomics                                                                         | This paper | <a href="https://ngdc.cnbc.ac.cn/omix">https://ngdc.cnbc.ac.cn/omix</a> : accession no. OMIX005049      |

---

### Experimental models: Organisms/strains

|                                                        |                        |                   |
|--------------------------------------------------------|------------------------|-------------------|
| <i>Mettl1<sup>fl/+</sup></i> mice                      | Biocytogen             | N/A               |
| <i>Wdr4<sup>R215L/+</sup></i> mice                     | Biocytogen             | N/A               |
| <i>Prrxl<sup>Cre</sup></i> mice                        | The Jackson Laboratory | Stock No: 005584  |
| <i>Sp7<sup>Cre</sup></i> mice                          | The Jackson Laboratory | Stock No: 035391  |
| <i>Gcn2<sup>+/-</sup> (Eif2ak4<sup>+/-</sup>)</i> mice | GemPharmatech          | Stock No: T012642 |
| <i>Tsc1<sup>fl/+</sup></i> mice                        | The Jackson Laboratory | Stock No: 005680  |

---

### Oligonucleotides

See Table S1-S3 for a list of primers.

---

### Software and algorithms

|              |                |                                                                     |
|--------------|----------------|---------------------------------------------------------------------|
| Fiji/ImageJ  | ImageJ         | <a href="https://imagej.nih.gov/ij/">https://imagej.nih.gov/ij/</a> |
| FV10-ASW 3.1 | Olympus        | <a href="http://www.olympus.com.cn/">http://www.olympus.com.cn/</a> |
| FlowJo 10    | BD Biosciences | <a href="https://www.flowjo.com/">https://www.flowjo.com/</a>       |

|                |                |                                                                                                                                                                                                                                                                                         |
|----------------|----------------|-----------------------------------------------------------------------------------------------------------------------------------------------------------------------------------------------------------------------------------------------------------------------------------------|
| μCT50          | SCANCO Medical | N/A                                                                                                                                                                                                                                                                                     |
| ChemiDoc       | Biorad         | <a href="https://www.bio-rad.com/en-jp/category/chemidoc-imaging-systems?ID=NINJ0Z15">https://www.bio-rad.com/en-jp/category/chemidoc-imaging-systems?ID=NINJ0Z15</a>                                                                                                                   |
| GraphPad Prism | Prism          | <a href="https://www.graphpad-prism.cn/prism.html">https://www.graphpad-prism.cn/prism.html</a>                                                                                                                                                                                         |
| SPSS 20.0      | IBM            | <a href="https://www.ibm.com/spss">https://www.ibm.com/spss</a>                                                                                                                                                                                                                         |
| Imaris 8.1     | Nikon          | <a href="https://imaris.oxinst.com/">https://imaris.oxinst.com/</a>                                                                                                                                                                                                                     |
| OsteoMeasure   | OsteoMetrics   | <a href="https://www.osteometrics.com/">https://www.osteometrics.com/</a>                                                                                                                                                                                                               |
| Seahorse Wave  | Agilent        | <a href="https://www.agilent.com/en/product/cell-analysis/real-time-cell-metabolic-analysis/xf-software/seahorse-wave-desktop-software-740897">https://www.agilent.com/en/product/cell-analysis/real-time-cell-metabolic-analysis/xf-software/seahorse-wave-desktop-software-740897</a> |

---
